# Supplementary material for: Discovery of Volatile Biomarkers for Bladder Cancer Detection and Staging through Urine Metabolomics
Source: PubMed Central journal article supplement (PMC8066175; doi:10.3390/metabo11040199), 2021-03-26
Supplement: metabolites-11-00199-s001.pdf [file metabolites-11-00199-s001.pdf]

## Supporting Information

### Discovery of volatile biomarkers for bladder cancer detection and staging through urine metabolomics

Joana Pinto <sup>1,\*</sup>, Ângela Carapito <sup>1</sup>, Filipa Amaro <sup>1</sup>, Ana Rita Lima <sup>1</sup>, Carina Carvalho-Maia <sup>2,3</sup>, Maria Conceição Martins <sup>2,3</sup>, Carmen Jerónimo <sup>1,2,3</sup>, Rui Henrique <sup>1,2,3</sup>, Maria de Lourdes Bastos <sup>1</sup> and Paula Guedes de Pinho <sup>1,\*</sup>

<sup>1</sup> UCIBIO/REQUIMTE, Department of Biological Sciences, Laboratory of Toxicology, Faculty of Pharmacy, University of Porto, 4050-313, Porto, Portugal

<sup>2</sup> Cancer Biology & Epigenetics Group–Research Centre, Portuguese Oncology Institute of Porto (CI-IPOP), 4200-072, Porto, Portugal

<sup>3</sup> Department of Pathology, Portuguese Oncology Institute of Porto, 4200-072, Porto, Portugal

<sup>4</sup> Department of Pathology and Molecular Immunology, Institute of Biomedical Sciences Abel Salazar–University of Porto (ICBAS-UP), 4050-313, Porto, Portugal

\*Corresponding authors

E-mail addresses:

[jipinto@ff.up.pt](mailto:jipinto@ff.up.pt) (Joana Pinto)

[pguedes@ff.up.pt](mailto:pguedes@ff.up.pt) (Paula Guedes de Pinho)

Address:

UCIBIO/REQUIMTE, Laboratory of Toxicology

Department of Biological Sciences

Faculty of Pharmacy

University of Porto

Rua Jorge Viterbo Ferreira, 228

4050-313 Porto, Portugal

Tel.: +351 220428599; fax: +351 226093390

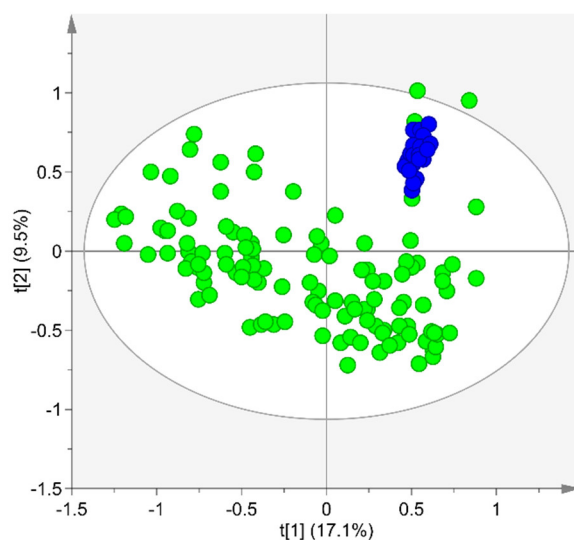

**Figure S1.** PCA scores scatter plots obtained for urinary volatile profile (full set of VOCs and VCCs concatenated matrix) of all samples (BC  $n=53$  and cancer-free controls  $n=56$ , green circles) and QCs ( $n=24$ , blue circles).

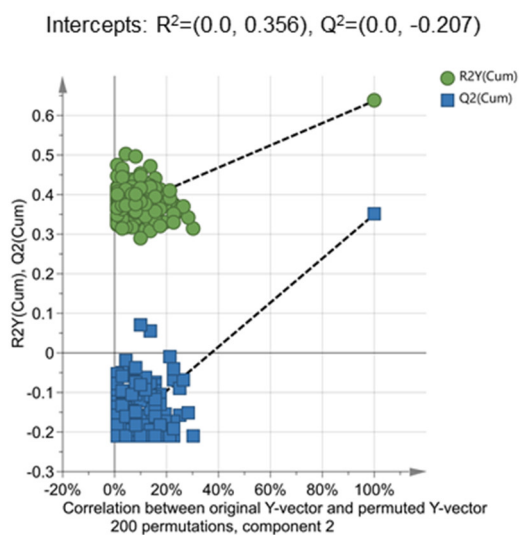

**Figure S2.** Statistical validation of the PLS-DA model obtained for the urinary volatile profile of BC patients ( $n=53$ ) and cancer-free controls ( $n=56$ ), after variable selection (109 observations  $\times$  4184 variables), by permutation testing (200 permutations; 2 components).

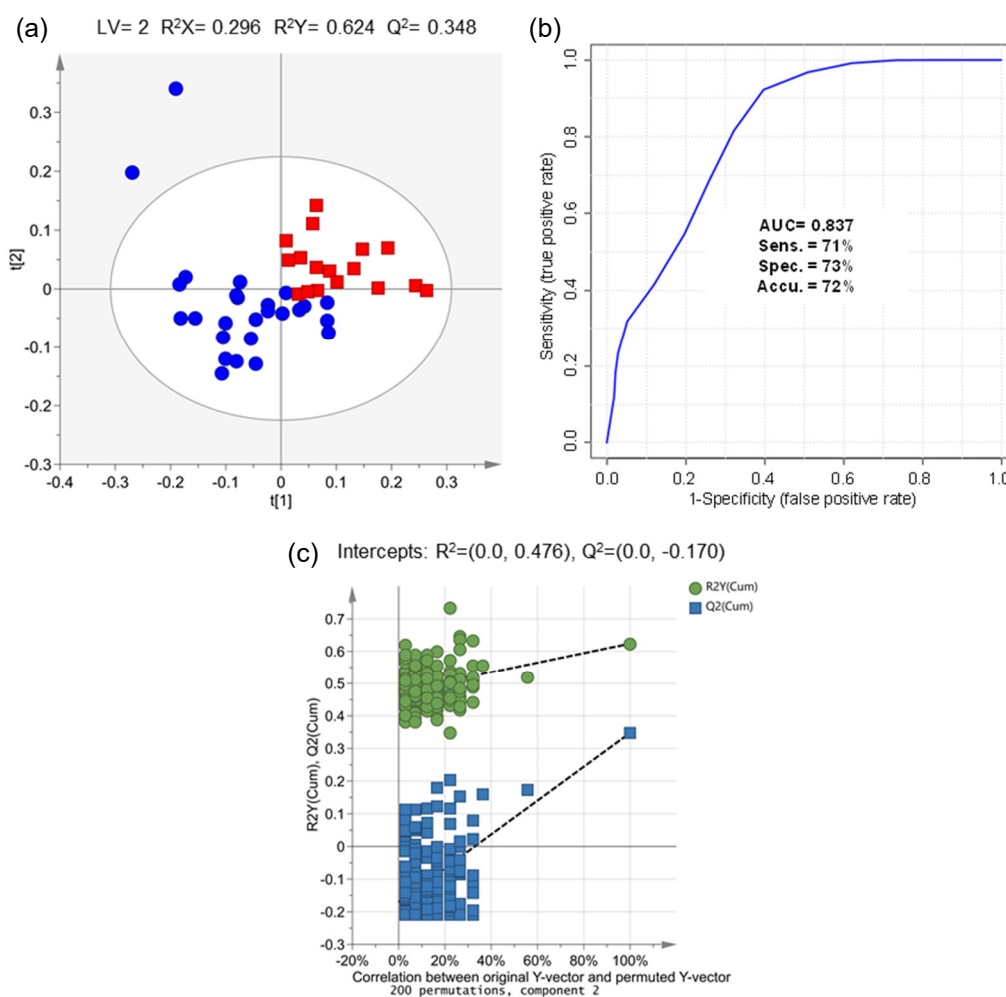

**Figure S3.** (a) PLS-DA scores scatter plot and (b) ROC curve obtained for urinary volatile profile (VOCs and VCCs concatenated matrix), after variable selection (43 observations  $\times$  495 variables), of stage T1 (red squares,  $n=17$ ) compared with stage Ta/Tis (blue circles,  $n=26$ ). (c) Statistical validation of the PLS-DA model by permutation testing (500 permutations; 2 components).

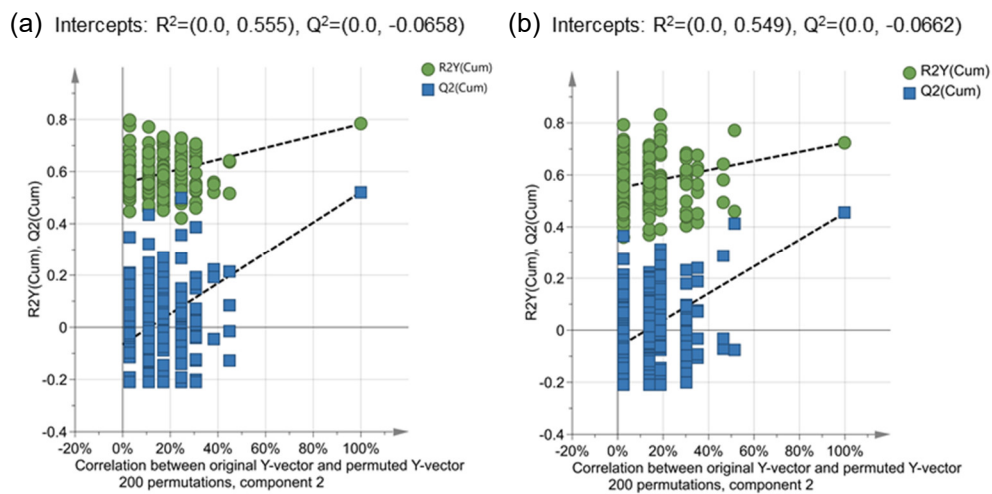

**Figure S4.** Statistical validation of the PLS-DA model obtained for urinary volatile profile of (a) patients diagnosed with MIBC (stages  $\geq T2$ ,  $n=10$ ) and NMIBC (stage Ta/Tis,  $n=26$ ), after variable selection (36 observations  $\times$  486 variables), and (b) patients diagnosed with MIBC (stages  $\geq T2$ ,  $n=10$ ) and NMIBC (stage T1,  $n=17$ ), after variable selection (27 observations  $\times$  856 variables), by permutation testing (200 permutations; 2 components).

**Table S1.** List of volatile compounds significantly altered in urine of BC patients compared to cancer-free controls and between different BC stages, including their retention time (RT), most abundant ions, NIST and experimental retention index (RI), R-match, CAS number and identification level.

| Metabolite <sup>a</sup>                           | RT (min)          | Characteristic ions ( <i>m/z</i> ) | NIST RI <sup>b</sup> | Experimental RI <sup>c</sup> | R-match | CAS number | Identification level <sup>d</sup> |
|---------------------------------------------------|-------------------|------------------------------------|----------------------|------------------------------|---------|------------|-----------------------------------|
| <i>Alkanes</i>                                    |                   |                                    |                      |                              |         |            |                                   |
| 2-Methylnonane <sup>e</sup>                       | 9.46              | 57/71/85                           | 964                  | 966                          | 776     | 871-83-0   | L2                                |
| 2,4-Dimethylheptane <sup>e</sup>                  | 5.47              | 57/71/85                           | 821                  | 823                          | 908     | 2213-23-2  | L2                                |
| 2,6-Dimethylnonane <sup>e</sup>                   | 11.15             | 57/71/85                           | 1018                 | 1022                         | 881     | 17302-28-2 | L2                                |
| 4-Methyloctane <sup>e</sup>                       | 6.53              | 57/71/85                           | 863                  | 863                          | 907     | 2216-34-4  | L2                                |
| Decane <sup>e</sup>                               | 10.50             | 57/71/85                           | 1000                 | 1001                         | 831     | 124-18-5   | L1                                |
| <i>Aldehydes</i>                                  |                   |                                    |                      |                              |         |            |                                   |
| 2-Furaldehyde (furan-2-carbaldehyde) <sup>f</sup> | 23.16/23.63       | 83/181/248/291                     | -                    | 1464/1483                    | 965     | 98-01-1    | L1                                |
| 2-Methylbutanal <sup>e</sup>                      | 2.80              | 57/58/86                           | 662                  | -                            | 842     | 96-17-3    | L1                                |
| 2,5-Dimethylbenzaldehyde <sup>e</sup>             | 16.85             | 77/91/105/133                      | 1208                 | 1213                         | 915     | 5779-94-2  | L2                                |
| Formaldehyde <sup>f</sup>                         | 9.92              | 117/161/181/195                    | -                    | 995                          | 874     | 50-00-0    | L1                                |
| Hexanal <sup>f</sup>                              | 22.36             | 181/239                            | -                    | 1433                         | 836     | 66-25-1    | L1                                |
| Methylglyoxal <sup>f</sup>                        | 33.02/33.21/33.52 | 181/265                            | -                    | 1907/1917/1933               | 943     | 78-98-8    | L1                                |
| Octanal <sup>e</sup>                              | 10.56             | 57/69/84                           | 1003                 | 1003                         | 811     | 124-13-0   | L1                                |
| <i>Aromatic hydrocarbons</i>                      |                   |                                    |                      |                              |         |            |                                   |
| 1-Methylnaphthalene <sup>e</sup>                  | 19.53             | 71/115/141/142                     | 1307                 | 1310                         | 854     | 90-12-0    | L2                                |
| 1,2,3-Trimethylbenzene <sup>e</sup>               | 11.08             | 91/105/120                         | 1013                 | 1020                         | 873     | 526-73-8   | L2                                |
| 1,2,4-Trimethylbenzene <sup>e</sup>               | 10.31             | 77/91/105/120                      | 990                  | 994                          | 912     | 95-63-6    | L2                                |
| 1,2,4,5-Tetramethylbenzene <sup>e</sup>           | 14.06             | 91/119/134                         | 1116                 | 1118                         | 877     | 95-93-2    | L2                                |

| Metabolite <sup>a</sup>                                                     | RT (min)    | Characteristic ions ( <i>m/z</i> ) | NIST RI <sup>b</sup> | Experimental RI <sup>c</sup> | R-match | CAS number | Identification level <sup>d</sup> |
|-----------------------------------------------------------------------------|-------------|------------------------------------|----------------------|------------------------------|---------|------------|-----------------------------------|
| 2-Methylnaphthalene <sup>e</sup>                                            | 19.11       | 71/115/141/142                     | 1298                 | 1294                         | 868     | 91-57-6    | L2                                |
| 2-Ethyl-1,3-dimethylbenzene <sup>e</sup>                                    | 13.00       | 91/119/134                         | 1080                 | 1083                         | 904     | 2870-04-4  | L2                                |
| <i>p</i> -Cresol (4-methylphenol) <sup>e</sup>                              | 12.65       | 77/107/108                         | 1077                 | 1071                         | 908     | 106-44-5   | L1                                |
| <i>Heterocyclic Compounds</i>                                               |             |                                    |                      |                              |         |            |                                   |
| (1S,5R)-1,5-dimethyl-6,8-dioxabicyclo[3.2.1]octane <sup>e</sup>             | 8.73        | 72/100/142                         | 949                  | 942                          | 824     | 28401-39-0 | L2                                |
| <i>Ketones</i>                                                              |             |                                    |                      |                              |         |            |                                   |
| 2-Butanone (butan-2-one) <sup>f</sup>                                       | 16.62/16.71 | 56/181/195/250                     | -                    | 1219/1222                    | 836     | 78-93-3    | L1                                |
| 4-Heptanone (heptan-4-one) <sup>f</sup>                                     | 22.02       | 70/128/181/253/309                 | -                    | 1419                         | 867     | 123-19-3   | L1                                |
| <i>Terpenoids</i>                                                           |             |                                    |                      |                              |         |            |                                   |
| Carvone (2-methyl-5-(prop-1-en-2-yl)cyclohex-2-en-1-one) <sup>e</sup>       | 17.67       | 54/82/93/108                       | 1242                 | 1243                         | 871     | 99-49-0    | L1                                |
| Levomenthol ((1R,2S,5R)-5-methyl-2-propan-2-ylcyclohexan-1-ol) <sup>e</sup> | 15.79       | 71/81/95/123/138                   | 1175                 | 1190                         | 946     | 2216-51-5  | L2                                |
| Piperitone (3-methyl-6-propan-2-ylcyclohex-2-en-1-one) <sup>e</sup>         | 17.93       | 82/95/110/137/152                  | 1253                 | 1252                         | 889     | 89-81-6    | L2                                |
| <i>Unknowns</i>                                                             |             |                                    |                      |                              |         |            |                                   |
| Unknown 1 <sup>e</sup>                                                      | 12.00       | 68/105/116                         | -                    | 1050                         | -       | -          | L4                                |
| Unknown 2 <sup>e</sup>                                                      | 12.16       | 57/71/85                           | -                    | 1055                         | -       | -          | L4                                |
| Unknown 3 <sup>e</sup>                                                      | 12.26       | 57/71/85                           | -                    | 1062                         | -       | -          | L4                                |
| Unknown 4 <sup>e</sup>                                                      | 16.58       | 135/164                            | -                    | 1204                         | -       | -          | L4                                |

| Metabolite <sup>a</sup> | RT (min) | Characteristic ions ( <i>m/z</i> ) | NIST RI <sup>b</sup> | Experimental RI <sup>c</sup> | R-match | CAS number | Identification level <sup>d</sup> |
|-------------------------|----------|------------------------------------|----------------------|------------------------------|---------|------------|-----------------------------------|
| Unknown 5 <sup>e</sup>  | 18.47    | 137/152                            | -                    | 1271                         | -       | -          | L4                                |
| Unknown 6 <sup>f</sup>  | 19.61    | 181/226                            | -                    | 1327                         | -       | -          | L4                                |
| Unknown 7 <sup>e</sup>  | 14.15    | 79/91                              | -                    | 1121                         | -       | -          | L4                                |
| Unknown 8 <sup>e</sup>  | 15.24    | 83/121/136                         | -                    | 1158                         | -       | -          | L4                                |
| Unknown 9 <sup>f</sup>  | 23.52    | 161/181                            | -                    | 1479                         | -       | -          | L4                                |

<sup>a</sup> Common metabolite name (IUPAC name). <sup>b</sup> Theoretical Kovats retention index (RI) extracted from NIST 14 database. <sup>c</sup> Experimental Kovats RI determined using a commercial hydrocarbon mixture (C6–C20). <sup>d</sup> Levels of confidence in metabolite identification [21,22]: L1 - identified metabolites (GC-MS analysis of the metabolite of interest and a chemical reference standard under identical analytical conditions within the same laboratory); L2 - putatively annotated compounds (spectral MS similarity with the NIST database); L3 - putatively characterized compound classes (spectral MS consistent with a particular class of organic compounds); L4 - unknown compounds. <sup>e,f</sup> Compounds detected through VOCs and VCCs analytical methods, respectively.

**Table S2.** Correlation coefficients and corresponding *p*-values computed between age and the set of metabolites found altered in urine of BC (*n*=53) compared to cancer-free controls (*n*=56).

| Metabolite <sup>a</sup>                                  | Correlation coefficient ( <i>r</i> ) | <i>p</i> -value |
|----------------------------------------------------------|--------------------------------------|-----------------|
| <i>Alkanes</i>                                           |                                      |                 |
| 2-Methylnonane                                           | 0.23                                 | 0.0160          |
| 2,4-Dimethylheptane                                      | 0.23                                 | 0.0159          |
| 2,6-Dimethylnonane                                       | 0.28                                 | 0.0027          |
| 4-Methyloctane                                           | 0.26                                 | 0.0074          |
| <i>Aldehydes</i>                                         |                                      |                 |
| 2-Furaldehyde (furan-2-carbaldehyde)                     | -0.16                                | 0.1062          |
| 2-Methylbutanal                                          | -0.23                                | 0.0172          |
| Formaldehyde                                             | -0.21                                | 0.0252          |
| Glyoxal                                                  | -0.10                                | 0.3068          |
| Hexanal                                                  | -0.16                                | 0.0909          |
| <i>Aromatic hydrocarbons</i>                             |                                      |                 |
| 1-Methylnaphthalene                                      | 0.31                                 | 0.0009          |
| 2-Methylnaphthalene                                      | 0.27                                 | 0.0041          |
| 1,2,4-Trimethylbenzene                                   | 0.29                                 | 0.0020          |
| <i>p</i> -Cresol (4-methylphenol)                        | 0.22                                 | 0.0203          |
| <i>Heterocyclic Compounds</i>                            |                                      |                 |
| (1S,5R)-1,5-dimethyl-6,8-dioxabicyclo[3.2.1]octane       | -0.31                                | 0.0012          |
| <i>Ketones</i>                                           |                                      |                 |
| 2-Butanone (butan-2-one)                                 | -0.25                                | 0.0079          |
| 4-Heptanone (heptan-4-one)                               | -0.12                                | 0.2125          |
| <i>Terpenoids</i>                                        |                                      |                 |
| Carvone (2-methyl-5-(prop-1-en-2-yl)cyclohex-2-en-1-one) | -0.31                                | 0.0012          |
| Piperitone (3-methyl-6-propan-2-ylcyclohex-2-en-1-one)   | -0.28                                | 0.0032          |
| <i>Unknowns</i>                                          |                                      |                 |
| Unknown 1                                                | 0.19                                 | 0.0457          |
| Unknown 2                                                | 0.24                                 | 0.0112          |
| Unknown 3                                                | 0.18                                 | 0.0674          |
| Unknown 4                                                | 0.16                                 | 0.0898          |
| Unknown 5                                                | -0.20                                | 0.0001          |
| Unknown 6                                                | -0.28                                | 0.0029          |



**Table S3.** List of five volatile metabolites found altered in urine of patients diagnosed with stage T1 ( $n= 17$ ) compared with stage Ta/Tis ( $n= 26$ ).

| Metabolite <sup>a</sup>                                                         | Effect size $\pm$<br>ES <sub>SE</sub> <sup>b</sup> | Variation $\pm$<br>uncertainty (%) | <i>p</i> -value<br>original | <i>p</i> -value<br>FDR <sup>c</sup> | AUC   | Down- or up-<br>regulated | HMDB ID     | Potential biochemical pathway |
|---------------------------------------------------------------------------------|----------------------------------------------------|------------------------------------|-----------------------------|-------------------------------------|-------|---------------------------|-------------|-------------------------------|
| <i>Alkane</i>                                                                   |                                                    |                                    |                             |                                     |       |                           |             |                               |
| Decane <sup>d, L2</sup>                                                         | 0.63 $\pm$ 0.48                                    | 183.7 $\pm$ 21.3                   | 0.0475                      | 0.0633                              | 0.681 | ↑                         | HMDB0031450 | Lipid peroxidation [12]       |
| <i>Aldehyde</i>                                                                 |                                                    |                                    |                             |                                     |       |                           |             |                               |
| Octanal <sup>d, L1</sup>                                                        | 0.72 $\pm$ 0.48                                    | 66.7 $\pm$ 12.1                    | 0.0294                      | 0.0632                              | 0.674 | ↑                         | HMDB0001140 | Lipid peroxidation [12]       |
| <i>Terpenoid</i>                                                                |                                                    |                                    |                             |                                     |       |                           |             |                               |
| Levomenthol ((1R,2S,5R)-5-methyl-2-propan-2-ylcyclohexan-1-ol) <sup>d, L2</sup> | -0.76 $\pm$ 0.48                                   | -57.0 $\pm$ 34.5                   | 0.0177                      | 0.0632                              | 0.715 | ↓                         | HMDB0003352 | Lipid metabolism [17]         |
| <i>Unknowns</i>                                                                 |                                                    |                                    |                             |                                     |       |                           |             |                               |
| Unknown 7 <sup>d, L4</sup>                                                      | 0.36 $\pm$ 0.47                                    | 139.2 $\pm$ 32.2                   | 0.0371                      | 0.0632                              | 0.690 | ↑                         | -           | -                             |
| Unknown 8 <sup>d, L4</sup>                                                      | -0.96 $\pm$ 0.49                                   | -63.4 $\pm$ 37.9                   | 0.0040                      | 0.0320                              | 0.758 | ↓                         | -           | -                             |

<sup>a</sup> Common metabolite name (IUPAC name). <sup>b</sup> Effect size  $\pm$  ES<sub>SE</sub> (effect size standard error) determined as described in reference <sup>21</sup>. <sup>c</sup> False discovery rate (FDR) correction of original *p*-values, computed as described in reference <sup>20</sup>. <sup>d, e</sup> Compounds detected through VOCs and VCCs analytical methods, respectively. Levels of confidence in metabolite identification, defined as described in references <sup>16,17</sup>: <sup>L1</sup> Identified metabolites (confirmed using a chemical reference standard); <sup>L2</sup> Putatively annotated compounds (NIST14 database); <sup>L3</sup> Putatively characterized compound classes (spectral MS similarity); <sup>L4</sup> Unknown compounds.

**Table S4.** List of eight volatile metabolites found altered in urine of patients diagnosed with stages  $\geq$ T2 ( $n=10$ ) compared with stage Ta/Tis ( $n=26$ ).

| Metabolite <sup>a</sup>                     | Effect size $\pm$<br>ES <sub>SE</sub> <sup>b</sup> | Variation $\pm$<br>uncertainty (%) | <i>p</i> -value<br>original | <i>p</i> -value<br>FDR <sup>c</sup> | AUC   | Down- or up-<br>regulated | HMDB ID     | Potential biochemical pathway |
|---------------------------------------------|----------------------------------------------------|------------------------------------|-----------------------------|-------------------------------------|-------|---------------------------|-------------|-------------------------------|
| <i>Alkanes</i>                              |                                                    |                                    |                             |                                     |       |                           |             |                               |
| 2,4-Dimethylheptane <sup>d, L2</sup>        | 1.86 $\pm$ 0.85                                    | 260.1 $\pm$ 46.3                   | 0.0002                      | 0.0010                              | 0.881 | ↑                         | -           | -                             |
| 4-Methyloctane <sup>d, L2</sup>             | 1.49 $\pm$ 0.81                                    | 493.9 $\pm$ 81.2                   | 0.0001                      | 0.0004                              | 0.904 | ↑                         | -           | -                             |
| Decane <sup>d, L1</sup>                     | 1.39 $\pm$ 0.79                                    | 186.1 $\pm$ 52.5                   | 0.0055                      | 0.0078                              | 0.796 | ↑                         | HMDB0031450 | Lipid peroxidation [12]       |
| <i>Aldehydes</i>                            |                                                    |                                    |                             |                                     |       |                           |             |                               |
| 2,5-Dimethylbenzaldehyde <sup>d, L2</sup>   | -0.81 $\pm$ 0.75                                   | -31.2 $\pm$ 10.7                   | 0.0037                      | 0.0071                              | 0.692 | ↓                         | HMDB0032014 | -                             |
| <i>Aromatic compounds</i>                   |                                                    |                                    |                             |                                     |       |                           |             |                               |
| 1,2,3-Trimethylbenzene <sup>d, L2</sup>     | 0.72 $\pm$ 0.75                                    | 50.6 $\pm$ 22.4                    | 0.0310                      | 0.0344                              | 0.735 | ↑                         | HMDB0059901 | -                             |
| 1,2,4-Trimethylbenzene <sup>d, L2</sup>     | 0.77 $\pm$ 0.75                                    | 45.7 $\pm$ 19.2                    | 0.0281                      | 0.0344                              | 0.738 | ↑                         | HMDB0013733 | -                             |
| 1,2,4,5-Tetramethylbenzene <sup>d, L2</sup> | 1.22 $\pm$ 0.78                                    | 97.5 $\pm$ 24.6                    | 0.0042                      | 0.0071                              | 0.804 | ↑                         | -           | -                             |
| <i>Unknowns</i>                             |                                                    |                                    |                             |                                     |       |                           |             |                               |
| Unknown 2 <sup>d, L4</sup>                  | 1.34 $\pm$ 0.79                                    | 228.6 $\pm$ 59.4                   | 0.0025                      | 0.0071                              | 0.819 | ↑                         | -           | -                             |

<sup>a</sup> Common metabolite name (IUPAC name). <sup>b</sup> Effect size  $\pm$  ES<sub>SE</sub> (effect size standard error) determined as described in reference <sup>21</sup>. <sup>c</sup> False discovery rate (FDR) correction of original *p*-values, computed as described in reference <sup>20</sup>. <sup>d, e</sup> Compounds detected through VOCs and VCCs analytical methods, respectively. Levels of confidence in metabolite identification, defined as described in references <sup>16,17</sup>: <sup>L1</sup> Identified metabolites (confirmed using a chemical reference standard); <sup>L2</sup> Putatively annotated compounds (NIST14 database); <sup>L3</sup> Putatively characterized compound classes (spectral MS similarity); <sup>L4</sup> Unknown compounds.

**Table S5.** List of six volatile metabolites found altered in urine of patients diagnosed with stages  $\geq$ T2 ( $n=10$ ) compared with stage T1 ( $n=17$ ).

| Metabolite <sup>a</sup>                                                         | Effect size $\pm$<br>ES <sub>SE</sub> <sup>b</sup> | Variation $\pm$<br>uncertainty (%) | <i>p</i> -value<br>original | <i>p</i> -value<br>FDR <sup>c</sup> | AUC   | Down- or up-<br>regulated | HMDB ID     | Potential biochemical pathway                                                                                 |
|---------------------------------------------------------------------------------|----------------------------------------------------|------------------------------------|-----------------------------|-------------------------------------|-------|---------------------------|-------------|---------------------------------------------------------------------------------------------------------------|
| <i>Alkane</i>                                                                   |                                                    |                                    |                             |                                     |       |                           |             |                                                                                                               |
| 2,4-Dimethylheptane <sup>d, L2</sup>                                            | 1.06 $\pm$ 0.83                                    | 138.8 $\pm$ 38.0                   | 0.0039                      | 0.0165                              | 0.829 | ↑                         | -           | -                                                                                                             |
| <i>Aldehydes</i>                                                                |                                                    |                                    |                             |                                     |       |                           |             |                                                                                                               |
| 2,5-Dimethylbenzaldehyde <sup>d, L2</sup>                                       | -0.88 $\pm$ 0.82                                   | -21.0 $\pm$ 9.0                    | 0.0419                      | 0.0419                              | 0.747 | ↓                         | HMDB0032014 | -                                                                                                             |
| Formaldehyde <sup>f, L1</sup>                                                   | 0.90 $\pm$ 0.82                                    | 81.0 $\pm$ 30.7                    | 0.0401                      | 0.0419                              | 0.724 | ↑                         | HMDB0001426 | Folate derivatives breakdown, protein and nucleic acid demethylations, glycine and serine metabolisms [13,14] |
| Methylglyoxal <sup>f, L1</sup>                                                  | 1.10 $\pm$ 0.83                                    | 58.4 $\pm$ 19.2                    | 0.0141                      | 0.0247                              | 0.776 | ↑                         | HMDB0001167 | Pyruvate metabolism, glycine and serine metabolism, spermidine and spermine biosynthesis [17]                 |
| <i>Terpenoid</i>                                                                |                                                    |                                    |                             |                                     |       |                           |             |                                                                                                               |
| Levomenthol ((1R,2S,5R)-5-methyl-2-propan-2-ylcyclohexan-1-ol) <sup>d, L2</sup> | 1.07 $\pm$ 0.83                                    | 207.7 $\pm$ 50.4                   | 0.0047                      | 0.0165                              | 0.824 | ↑                         | HMDB0003352 | -                                                                                                             |
| <i>Unknowns</i>                                                                 |                                                    |                                    |                             |                                     |       |                           |             |                                                                                                               |
| Unknown 9 <sup>d, L4</sup>                                                      | 1.17 $\pm$ 0.84                                    | 129.2 $\pm$ 37.3                   | 0.0093                      | 0.0218                              | 0.800 | ↑                         | -           | -                                                                                                             |

<sup>a</sup> Common metabolite name (IUPAC name). <sup>b</sup> Effect size  $\pm$  ES<sub>SE</sub> (effect size standard error) determined as described in reference <sup>21</sup>. <sup>c</sup> False discovery rate (FDR) correction of original *p*-values, computed as described in reference <sup>20</sup>. <sup>d, e</sup> Compounds detected through VOCs and VCCs analytical methods, respectively. Levels of confidence in metabolite identification, defined as described in references <sup>16,17</sup>: <sup>L1</sup> Identified metabolites (confirmed using a chemical reference standard); <sup>L2</sup> Putatively annotated compounds (NIST14 database); <sup>L3</sup> Putatively characterized compound classes (spectral MS similarity); <sup>L4</sup> Unknown compounds.

**Table S6.** Pre-processing steps of GC-MS chromatograms of VOCs and VCCs performed in MZmine-2.52.

| <b>Pre-processing steps</b> | <b>VOCs</b>                                                        | <b>VCCs</b>                                                       |
|-----------------------------|--------------------------------------------------------------------|-------------------------------------------------------------------|
| Crop filtering              | RT range: 2-34 min<br><i>m/z</i> range: 50-250                     | RT range: 9.8-46 min<br><i>m/z</i> range: 50-300                  |
| Peak detection              | Noise level: $1 \times 10^4$                                       | Noise level: $1 \times 10^5$                                      |
| Chromatogram builder        | Intensity threshold: $5 \times 10^4$<br><i>m/z</i> tolerance: 0.07 | Intensity threshold: $5 \times 10^6$<br><i>m/z</i> tolerance: 0.1 |
| Deconvolution               | Baseline level: $1 \times 10^4$<br>Peak range: 0.03-0.5 min        | Baseline level: $5 \times 10^5$<br>Peak range: 0.03-0.5 min       |
| Alignment                   | RT tolerance: 0.2 min<br><i>m/z</i> tolerance: 0.07                | RT tolerance: 0.2 min<br><i>m/z</i> tolerance: 0.1                |
